# Supplementary material
Source: Springer Nature journal article supplement (https://www.springermedizin.de/resource/supplementary/12879_2013_2945_MOESM1_ESM.pdf/9445394)
Supplement: MOESM1 [file 9445394]

# 85,000 CAPiTA participants

*EQ-5D questionnaire for baseline measurement (October 2008 – January 2010)*

With baseline EQ-5D score  
and consent  
~25,500 persons  
**= CHO-CAP baseline cohort**

Without baseline EQ-5D score  
~59,500 persons

**Develop CAP  
(i.e. diseased persons)  
'CAP cases'  
~600 persons**

**Unaffected persons  
(i.e. no CAP)  
'controls'  
~24,900 persons**

**Develop CAP  
(i.e. diseased persons)  
~1,400 persons**

**Unaffected persons  
(i.e. no CAP)  
~58,100 persons**

If consent, included in  
**diseased cohort.**  
Contact at 0, 1, 6 and  
12 months

If consent, 2 controls  
per CAP included in  
**non-diseased cohort,**  
by matching on:  
•Age  
•Sex  
•Baseline EQ-5D score  
Contact at 0, 1, 6 and  
12 months.

*Information on mortality, withdrawal, loss to follow-up and some information on socio-demographic data and comorbidity from main trial for all participants;*

*Information on hospital resources used from the Etio-CAP substudy and main trial CAP cases.*
